1 **Exon-based phylogenomics strengthens the phylogeny of Neotropical cichlids and**  
2 **identifies remaining conflicting clades (Cichliformes: Cichlidae: Cichlinae)**

3

4 **Katriina L. Ilves<sup>1,2\*</sup>, Dax Torti<sup>3,4</sup>, and Hernán López-Fernández<sup>1</sup>**

5 <sup>1</sup> Department of Natural History, Royal Ontario Museum, 100 Queen's Park, Toronto,  
6 ON M5S 2C6 Canada

7 <sup>2</sup> Current address: Biology Department, Pace University, 1 Pace Plaza, New York, NY  
8 10038

9 <sup>3</sup> Donnelly Sequencing Center, University of Toronto, 160 College Street, Toronto, ON  
10 M5S 3E1 Canada

11 <sup>4</sup> Current address: Ontario Institute for Cancer Research, MaRS Center, 661 University  
12 Avenue, Toronto, ON M5G 0A3 Canada

13 \*Corresponding author at: Biology Department, Pace University, 1 Pace Plaza, New  
14 York, NY 10038; email: [katriina.ilves@gmail.com](mailto:katriina.ilves@gmail.com)

15

16 **Abstract**

17 The phenotypic, geographic, and species diversity of cichlid fishes have made them a  
18 group of great interest for studying evolutionary processes. Here we present a targeted-  
19 exon next-generation sequencing approach for investigating the evolutionary  
20 relationships of cichlid fishes (Cichlidae), with focus on the Neotropical subfamily  
21 Cichlinae using a set of 923 primarily single-copy exons designed through mining of the  
22 Nile tilapia (*Oreochromis niloticus*) genome. Sequence capture and assembly were  
23 robust, leading to a complete dataset of 415 exons for 139 species (147 terminals) that

24 consisted of 128 Neotropical species, six African taxa, and five Indo-Malagasy cichlids.  
25 Gene and species trees were calculated using alternative partitioning schemes and  
26 reconstruction methods. In general, all methods yielded similar topologies to previously  
27 hypothesized relationships within the Cichlinae and clarified several relationships that  
28 were previously poorly supported or in conflict. Additional work will be needed to fully  
29 resolve all aspects of Cichlinae phylogeny. Overall, this approach yielded a well-resolved  
30 phylogeny of Neotropical cichlids that will be of utility for future assessments of the  
31 evolutionary and ecological processes within this diverse group of fishes. Furthermore,  
32 the general methodology employed here of exon targeting and capture should be  
33 applicable to any group of organisms with the availability of a reference genome.

34

35 Key words: Cichlidae, Cichlinae, phylogenomics, exon capture, Neotropics

36

### 37 **1. Introduction**

38 Neotropical cichlid fishes are rapidly becoming a model to understand the  
39 evolutionary history and biogeography of the exceptionally diverse Neotropical  
40 freshwater fish fauna (e.g., Arbour and López-Fernández 2014, 2016; Astudillo-Clavijo  
41 et al. 2015; Burrell 2016; Hulsey and García de León 2005; Hulsey et al. 2006; López-  
42 Fernández et al. 2013; McMahan et al. 2013; Říčan et al. 2013; Tagliacollo et al. 2015).  
43 Likewise, the emergence of Neotropical cichlids as models of adaptive diversification in  
44 riverine environments is starting to provide a meaningful complement to the long-  
45 established studies of adaptive radiation of lacustrine cichlids in Africa (e.g., Brawand et  
46 al. 2014; Fryer and Iles 1972; Kocher 2004; Seehausen 2015; Wagner et al. 2012).

47 Nevertheless, continuing the evolutionary study of Neotropical cichlids depends on the  
48 availability of a robust phylogenetic framework that allows reliable reconstruction of  
49 divergence times, supports comparative analysis of lineage and phenotype divergence,  
50 and clarifies our understanding of biogeographic history.

51 Numerous studies have addressed the intergeneric and higher level relationships  
52 of Neotropical cichlids or some of their clades, and a relatively clear phylogenetic  
53 structure for the subfamily has emerged over the last two decades (e.g. Concheiro-Pérez  
54 et al. 2007; Farias et al. 1999, 2000; Hulsey et al. 2004, 2010; Kullander 1998; López-  
55 Fernández et al. 2010; McMahan et al. 2013; Musilová et al. 2008, 2009; Říčan et al.  
56 2013, 2016; Smith et al. 2008). While these analyses have resulted in an increasingly  
57 stable understanding of Cichlinae relationships, a well-established taxonomy at the tribe  
58 level, and a relatively robust set of relationships among genera, a fully resolved and  
59 unambiguously supported phylogeny of Neotropical cichlids has yet to be achieved. This  
60 is particularly true of several basal relationships among genera or groups of genera within  
61 the three main tribes, Geophagini, Cichlasomatini and Heroini that remain poorly  
62 resolved or supported (e.g., López-Fernández et al. 2010; McMahan et al. 2013; Říčan et  
63 al. 2016).

64 Most analyses of Neotropical cichlid phylogeny have been based on relatively  
65 few loci (usually 10 or less) and often have been heavily informed by mitochondrial data  
66 (e.g., Friedman et al. 2013; López-Fernández et al. 2010; McMahan et al. 2013; Říčan et  
67 al. 2008; Smith et al. 2008). These studies are therefore limited in their ability to provide  
68 robust phylogenetic analyses, especially in the light of sequence saturation (e.g. Farias et  
69 al. 2001; López-Fernández et al. 2005), conflicting signal between nuclear and

70 mitochondrial data (Dornburg et al. 2014; Říčan et al. 2016), and extensive basal short  
71 branches that often receive poor statistical support (López-Fernández et al. 2005, 2010).  
72 Beyond these well-known limitations, the small size of these datasets does not allow the  
73 incorporation of species tree approaches to phylogenetic analyses, and thus, all these  
74 studies are susceptible to producing misleading relationships due to conflict between  
75 gene trees and species trees (e.g. Edwards 2009; Maddison 2007). A recent study by  
76 Říčan et al. (2016) attempted to circumvent some of these potential limitations by using a  
77 large dataset of concatenated single nucleotide polymorphisms (SNPs) derived from  
78 restriction enzyme associated DNA (ddRAD). They obtained a largely well-supported  
79 tree with the largest taxon sampling of Central American cichlids to date, but their  
80 analysis was not able to unambiguously resolve some relationships and was limited to  
81 only one clade within Cichlinae. Moreover, Říčan et al.'s (2016) dataset is not amenable  
82 to be analyzed under coalescent-based methods and therefore cannot identify potential  
83 conflicts in phylogenetic relationships derived from the effects of deep coalescence (e.g.  
84 Edwards 2009; Heled and Drummond 2010). This latter point is relevant because the  
85 Neotropical cichlid phylogeny is plagued by short basal branches that, in previous work,  
86 have been interpreted as evidence of rapid diversification (López-Fernández et al. 2005,  
87 2010). Concordant with this interpretation, comparative studies are revealing patterns of  
88 rapid early lineage and phenotype diversification through habitat and diet-related  
89 morphological diversification (e.g., Arbour and López-Fernández 2014; López-Fernández  
90 et al. 2013). These short branches, however, also represent a problem in phylogenetic  
91 reconstruction because rapid divergence can result in marked incongruence between gene  
92 divergence patterns and species divergence patterns due to population-level phenomena

93 such as deep coalescence (e.g., Edwards 2009; Kubatko and Degnan 2007). Traditional  
94 phylogenetic methods such as those generally used in Neotropical cichlid analyses  
95 assume that loci in the genome diverge in concert with the species-level divergence of  
96 their corresponding species and that the phylogenetic signal is additive across loci;  
97 however, it is widely understood that genes have their own phylogenetic histories (gene  
98 trees) and that those histories do not always coincide node-to-node with the phylogenetic  
99 history of evolving lineages (species trees) (e.g., Maddison 2007). These incongruences  
100 between gene trees and species trees can be caused by several mechanisms, including  
101 hybridization and introgression, but for phylogenetic purposes the most widespread and  
102 potentially problematic is incomplete lineage sorting (ILS) or deep coalescence (Edwards  
103 2009). From a phylogenetic reconstruction point of view, the challenge is how to identify  
104 the signal of individual gene divergence that is congruent with species divergence (Heled  
105 and Drummond 2010). It has been repeatedly shown that concatenation of sequences  
106 from genes with incongruent gene trees can produce erroneous topologies with high  
107 statistical support (Edwards 2009; Heled and Drummond 2010; Mendes and Hahn 2017).  
108 In the case of several Neotropical cichlid clades, short, poorly supported basal branches  
109 could result from poor sampling of that portion of the tree or represent times of  
110 divergence during which ILS resulted from fast species divergence. In the latter case,  
111 concatenated phylogenetic analyses could result in misleading topological  
112 reconstructions. Clearly separating these two scenarios, lack of data versus deep  
113 coalescence, may not be entirely possible, but the use of many independent nuclear loci  
114 (to increase gene tree sampling) and comparing concatenation methods and gene tree  
115 methods should help clarifying whether the pattern observed is due to a real evolutionary

116 process or is the result of lack of data, improper analysis or both. Until recently, both the  
117 availability of methods to analyze species trees and the technical difficulties associated  
118 with identifying and sequencing many nuclear loci made this type of analysis very  
119 difficult or plainly inaccessible. With the advent of massively parallel sequencing and the  
120 development of methods that allow reconstructing phylogenies using models based on the  
121 coalescent, it is now possible to re-evaluate the phylogeny of Neotropical cichlids using  
122 phylogenomic datasets of hundreds of loci along with methods that correct for the effects  
123 of ILS. Despite these promising developments, however, computational limitations still  
124 restrict the options available to analyze truly phylogenomic datasets (e.g. hundreds or  
125 thousands of loci) with relatively large numbers of terminals and explicit coalescent  
126 analyses of sequence alignments.

127         In this study we used massively parallel sequencing and a custom-designed exon  
128 target-capture toolkit (Ilves and López-Fernández 2014) to generate a phylogenomic  
129 analysis of Neotropical cichlids under both concatenation and summary coalescent  
130 approaches. The main goals of the study were to update currently available hypotheses of  
131 Cichlinae relationships with a much larger dataset than previously available, and to  
132 leverage the phylogenomic dataset to perform coalescent-based analyses that should  
133 account for the possible effects of incomplete lineage sorting on our ability to accurately  
134 reconstruct Cichlinae relationships.

135

## 136 **2. Materials and Methods**

### 137 *2.1. Taxon selection*

138 Selection of taxa aimed at including as many lineages of Neotropical cichlids as  
139 possible. Representatives of all recognized genera were included for all tribes except the  
140 Heroini. A recent proliferation of new generic names for taxa within Heroini has  
141 taxonomically separated several monophyletic lineages that were previously considered  
142 congeners (McMahan et al. 2015, Říčan et al. 2016). More importantly, many  
143 previously “orphan” clades variously referred to as ‘*Cichlasoma*’ *sensu lato* or ‘*Heros*’  
144 have been formally assigned names. Given that these changes occurred after the dataset  
145 for this study was generated, representatives for some of these new genera are absent, but  
146 our dataset includes members of every clade within Heroini. Moreover, the study revises  
147 the identification of a few lineages of questionable identity in a previous analysis led by  
148 the senior author of this paper (López-Fernández et al. 2010, and see Říčan et al. 2013).  
149 Although those changes did not greatly affect the overall results of those analyses, they  
150 did incorporate additional uncertainty to the resolution of relationships within a clade of  
151 Heroini and, therefore, it is pertinent to correct them.

152 The dataset used herein closely resembles that of López-Fernández et al. (2010),  
153 and focuses on improving sampling of portions of the tree that were most problematic in  
154 that study in hopes of improving resolution and support for uncertain groupings such as  
155 those among the Cichlasomatini *Acaronia* and *Laetacara*, as well as some basal  
156 relationships among Geophagini and the heroin clade “amphilophines” *sensu* López-  
157 Fernández et al. (2010). Taxon sampling also was designed to test the depth of  
158 phylogenetic divergence that could be resolved using the targeted capture probes used in  
159 this study (and see Ilves and López-Fernández 2014). At the most recent variation end of  
160 the spectrum, we included two individuals of several species to test whether the dataset

161 had enough phylogenetic signal to identify species as monophyletic. We also tested the  
162 ability of the dataset to resolve species-level relationships within genera by including a  
163 comparatively large number of species within the large *Crenicichla-Teleocichla* clade of  
164 Geophagini.

165 Altogether, the dataset included 147 terminals representing 139 species. Of these,  
166 128 were Neotropical species and six were African taxa, which represent the sister group  
167 of Cichlinae. These taxa include *Heterochromis multidentis*, the sister to all African  
168 cichlids, and both the reference sequence and a newly generated set of sequences for the  
169 Nile Tilapia, *Oreochromis niloticus*, the species from which the probes for target capture  
170 were developed (Ilves and López-Fernández 2014). Finally, we included five Indo-  
171 Malagasy cichlids which are sister to the African-Neotropical clade. The Sri Lankan  
172 cichlid *Eetroplus suratensis* was used as the outgroup in all analyses. *Eetroplus* and its  
173 sister genus, *Pseudetroplus*, are part of the Eetroplinae subfamily which forms the sister  
174 group to the rest of the family (e.g., López-Fernández et al. 2010; Sparks 2008; Sparks  
175 and Smith 2004; Stiassny 1991). The complete list of species, museum catalog numbers,  
176 accession numbers (when available) and general locality data are given in Appendix A.  
177

## 178 2.2. Library preparation for exon capture and sequencing

179 DNA extraction procedures followed those from Ilves and López-Fernández  
180 (2014). Exon capture of 923 targets and sequencing was performed at the Donnelly  
181 Sequencing Centre (DSC) at the University of Toronto  
182 (<http://dsc.utoronto.ca/dsc/index.html>) led by D. Torti, using the probes and general  
183 protocol described in Ilves and López-Fernández (2014). A double-hybridization



184 procedure of probes to templates was performed, as this was found to significantly  
185 increase yield in previous work (Ilves and López-Fernández 2014). Details about the  
186 probe clean-up, library preparation, and exon capture procedure can be found in  
187 Appendix B. Paired-end sequencing was conducted on an Illumina HiSeq platform.

188

### 189 *2.3. Automation of data processing and analysis*

190 Multiple custom scripts were used to automate data processing and analysis from  
191 the initial step of read quality control to the creation of maximum likelihood phylogenetic  
192 gene trees. An overview file that describes each step can be found in Appendix C and  
193 subsequent appendices contain the specific script files used to perform each particular  
194 task or set of tasks.

195

### 196 *2.4. Sequence quality control, read assembly and consensus sequence generation*

197 The general procedures and parameters for the quality control of the sequencing  
198 reads, assembly of the reads into contigs, and generation of consensus sequences for each  
199 exon and species follow those from Ilves and López-Fernández (2014). A custom script  
200 was run that automated read quality control, contig assembly, and consensus sequence  
201 generation (Appendix D). Briefly, the standalone version of PRINSEQ (Schmieder and  
202 Edwards 2011) was used to retain only high-quality reads based on read length and base  
203 quality, bowtie2 version 2.1.0 (Langmead and Salzberg 2012) was used to map the  
204 contigs to a set of reference sequences from the Nile tilapia (*Oreochromis niloticus*)  
205 genome (Appendix E), and SAMtools version 0.1.19-44428cd (Li et al. 2009) was used  
206 to generate consensus sequences of the assembled contigs. Custom scripts were used to

207 convert the FASTQ files to FASTA files for alignment (Appendix F) and convert all low  
208 quality base calls to “N” and trim terminal “N”s (Appendix G). FASTA sequences were  
209 imported into Geneious version 7.1.8 (<http://www.geneious.com>, Kearse et al. 2012),  
210 from which only sequences with a minimum of 100 bp were exported for subsequent use  
211 in alignment and phylogenetic analyses.

212

### 213 *2.5. Sequence alignment and gene tree and species tree phylogenetic analyses*

214 A custom script was used to combine all sequences for each exon into a single file  
215 (Appendix H). Sequence alignment for each exon was performed with muscle version  
216 3.8.31 (Edgar 2004) using default parameters and was automated using a custom script  
217 (Appendix I). Each alignment was then manually inspected for quality and completeness  
218 in Geneious version 7.1.8 (<http://www.geneious.com>, Kearse et al. 2012). Only  
219 alignments that included a sequence of at least 100 bp for each taxon were retained for  
220 phylogenetic analyses. The 32 opsin exon alignments in the target kit were excluded from  
221 all analyses because they represent a family of genes for which duplication and  
222 pseudogenization events have been documented, complicating their use in phylogenetics  
223 due to paralogy (e.g., Bowmaker 2008; Weadick et al. 2012).

224 Coding and non-coding regions of each alignment were inferred from the  
225 annotated reference genome. Although the probes, as originally designed, were intended  
226 to target exon-coding regions, analyses of early alignments during the design of the  
227 protocol revealed non-open reading frames for some sequences (see Ilves and López-  
228 Fernández 2014). Additionally, subsequent iterations of annotation in the Nile tilapia  
229 genome revealed that some regions originally annotated as coding exonic regions actually

230 corresponded to non-coding fragments. Coding and non-coding regions were identified  
231 and correspondingly separated for analyses in this paper. Bootstrapped gene trees (1000  
232 replicates) for each exon alignment were generated using RAxML version 8.0.10  
233 (Stamatakis 2014) with a GTRGAMMA model and a corresponding partition file with  
234 the codon positions and non-coding regions of the exon. This procedure was automated  
235 with a custom script (Appendix J).

236            ASTRAL-II version 4.8.0 (Mirarab and Warnow 2015) and STAR (Liu et al.  
237 2009) species tree methods with multi-locus bootstrapping (Seo 2008) were run on the  
238 resulting bootstrapped RAxML datasets. ASTRAL-II analyses with 500 bootstrap  
239 replicates were run locally on a desktop Apple® iMac whereas STAR analyses were run  
240 on the STRAW server (Shaw et al. 2013). Because ASTRAL analyses require a  
241 maximum likelihood (ML) tree for each gene in addition to the set of bootstrapped tree  
242 files, RAxML was used to conduct 40 ML searches on each exon alignment (custom  
243 script Appendix K). To assess possible conflicts between species-tree and total-evidence  
244 concatenated analyses, we also performed an ML analysis of 415 concatenated loci with  
245 one thousand bootstrap replicates using RAxML.

246

## 247 *2.6. Computing resources used:*

248            Read quality control, mapping, contig assembly, consensus sequence generation,  
249 and sequence alignment and some individual gene alignment RAxML analyses were  
250 performed locally on a desktop Apple iMac (3.5 GHz Intel Quad Core i7 with 32GB  
251 RAM and 3TB hard drive). Some individual gene alignment RAxML analyses were

252 performed on the GPC supercomputer at the SciNet HPC Consortium (Loken et al.  
253 2010).

254

### 255 *2.7. Data availability*

256 Alignments for all exons with complete taxon representation of 100 bp or greater  
257 as well as all bootstrapped phylogenetic trees, will be available on Dryad and all other  
258 data files, including raw fastq files, are available from corresponding author K.L. Ilves  
259 upon request.

260

## 261 **3. Results**

### 262 *3.1. Target capture*

263 923 exons are included in the probe set first developed by Ilves and López-  
264 Fernández (2014). 32 exons correspond to opsins, which were excluded from this study *a*  
265 *priori* due to their histories of gene duplication, which left a total of 891 exons as  
266 potential targets. Details about the number of reads obtained and retained after  
267 sequencing, the alignment rate, and number of exons captured per sample can be found in  
268 Appendix L (Table S1). Enforcing the restrictions of a complete dataset where every  
269 species must have a sequence of at least 100 bp, resulted in a dataset of 428 captured  
270 exons. 13 of these alignments were deemed to be ‘poor’ after visual inspection due to  
271 large blocks of ambiguous base pair calls (N) present in multiple species, often  
272 comprising over 50% of the total sequence length. Although the minimum sequence  
273 length was set at 100 bp, the average minimum sequence length relative to the average  
274 reference sequence length of 1136 bp was ~62% (SD 23%), indicating that most species

275 had sequence for most of the length of each target. The final dataset comprised 147 taxa  
276 representing 139 species for 415 exons (~47% of target set) with a total length of 471,448  
277 bp.

278

### 279 3.2. Depth of phylogenetic resolution in the exon-capture dataset

280 Analyses of multiple individuals within a species consistently resulted in  
281 monophyly at the species level with unambiguous support, as revealed by the  
282 concatenated analyses (Fig. S1, Appendix M). These results were consistent at various  
283 levels of divergence, ranging from resequencing of the African reference *Oreochromis*  
284 *niloticus* to newly sequenced Neotropical species in all major tribes (e.g. Geophagini:  
285 *Crenicichla sveni*, Cichlasomatini: *Krobia petitella*, Heroini: *Symphysodon*  
286 *aequifasciatus*). Both concatenated and consensus coalescence analyses of species-level  
287 divergence within genera also revealed a large phylogenetic signal that resulted in  
288 generally well-resolved and supported relationships among species within genera (e.g.  
289 *Crenicichla*). These results generally support the notion that the target capture probes  
290 used in this study are adequate to resolve phylogenetic relationships within Cichlidae  
291 spanning family to species levels of divergence.

292

### 293 3.3. Phylogenetic analyses

294 All analyses, regardless of methods, recovered the expected monophyletic  
295 Neotropical subfamily Cichlinae as sister to a monophyletic African Pseudocrenilabrinae,  
296 both of which in turn are sister to a paraphyletic arrangement of Indian and Malagasy  
297 lineages in the subfamilies Etroplinae and Ptychochrominae (Fig. 1). These relationships

298 have long been well established through numerous studies of molecular and  
299 morphological datasets and will not be discussed further (Friedman et al. 2013; López-  
300 Fernández et al. 2010; McMahan et al. 2013; Matschiner et al. 2017; Smith et al. 2008;  
301 Sparks 2004, 2008; Stiassny 1991). Relationships among the seven recognized tribes of  
302 Neotropical cichlids (Cichlini, Retroculini, Astronotini, Chaetobranchini, Geophagini,  
303 Cichlasomatini and Heroini), were likewise recovered unambiguously across analyses.  
304 Results herein coincide with previous work in placing the Retroculini and Cichlini clade  
305 as sister to the remainder of Cichlinae. The tribes Cichlasomatini and Heroini form a  
306 monophyletic clade sister to a clade formed by Astronotini, Chaetobranchini and  
307 Geophagini. Interestingly, all analyses recovered Astronotini (genus *Astronotus*) as sister  
308 to the Chaetobranchini plus Geophagini clade. This relationship was also found by  
309 Matschiner et al. (2017), but has not been universally recovered in previous analyses:  
310 Smith et al. (2008) found *Astronotus* as sister to all Cichlinae except Cichlini and  
311 Retroculini, López-Fernández et al. (2010) found it as sister to the Cichlasomatini and  
312 Heroini clade, and McMahan et al. (2013) recovered the genus as sister to a clade of  
313 Chaetobranchini and Geophagini. All these studies were based on a limited set of genes  
314 and a large amount of mitochondrial data, suggesting that the much larger dataset used  
315 herein resolves the previously unstable placement of Astronotini.

316 In general, intergeneric relationships within each of the main Neotropical tribes, --  
317 Geophagini, Cichlasomatini and Heroini--, were recovered with unambiguous support.  
318 Nevertheless, considerable ambiguity was observed across methods in the placement of  
319 some lineages within these tribes (see Fig. 1). Given the widespread similarity among  
320 topologies, for the remainder of the paper we use the ASTRAL-II coalescent species-tree

321 (Fig. 1) as a reference because of the superior performance of Astral-II as a tool for  
322 generating coalescent-based consensus species trees from gene trees (e.g. Arcila et al.  
323 2016). Nevertheless, disagreements between this topology and those derived from the  
324 STAR species-tree method and the concatenated super-matrix topology are highlighted  
325 when pertinent (Fig. 2). Later we discuss the potential impact of topological uncertainty  
326 on macroevolutionary analyses and historical biogeographic studies of Neotropical  
327 cichlids.

328         Within the tribe Heroini, all analyses coincide in placing the South American  
329 lineages as a paraphyletic arrangement at the base of the clade, with the genus  
330 *Pterophyllum* as the earliest diverging lineage, followed by a clade of *Hoplarchus* and  
331 *Hypselecara* and then by a clade (mesonautines, Fig. 1) in which *Mesonauta* is sister to  
332 *Heros*, which is in turn sister to *Symphysodon* and *Uaru*. A similar arrangement has been  
333 found by other studies (e.g., McMahan et al. 2013), but the position of *Pterophyllum* can  
334 be flipped with that of *Hypselecara* and *Hoplarchus* clade (e.g., López-Fernández et al.  
335 2010). Likewise, all analyses resulted in less than complete support for the position of  
336 *Heros*, but the placement does not vary across trees in this study. Support for the  
337 placement of *Heros* in previous studies (e.g., López-Fernández et al. 2010) was relatively  
338 weak, and despite orders of magnitude increase in the number of loci used herein, the  
339 phylogenomic analyses still result in less than 100% bootstrap support for the position of  
340 the genus. Contrastingly, the current analyses removed all ambiguity from the previously  
341 uncertain placement of the genus *Uaru* (López-Fernández et al. 2010).

342         As in previous studies, the remainder of Heroini is comprised by a geographically  
343 non-monophyletic arrangement of South and Central American lineages. Among these, a

344 clade including the genera *Rocio*, *Tomocichla*, *Herotilapia* and *Astatheros* is sister to the  
345 rest of Heroini. This arrangement is equivalent to and in the same position of the  
346 astatheroines clade sensu Říčan et al. (2016), but it does not include their newly  
347 described genus *Cribroheros*, which was not represented in our dataset. Říčan et al.  
348 (2016) recently split *Astatheros* sensu López-Fernández et al.'s (2010) into *Astatheros*,  
349 *Rocio* and *Cribroheros*, but phylogenetically there is no incongruence among the groups  
350 in both studies. The astatheroine clade is sequentially followed by the genus  
351 *Australoheros* as sister to all other heroins, an arrangement identical with that found by  
352 Říčan et al.'s (2016) analysis based on concatenated single nucleotide polymorphisms  
353 from a restriction site associated DNA (RAD) dataset. This result differs from that of  
354 López-Fernández et al. 2010 because the only species of *Australoheros* in that study was  
355 inadvertently switched with that of the unrelated *Cryptoheros nanoluteus* (see Appendix  
356 A for details, and Říčan et al. 2013). McMahan et al. (2013) also find a different  
357 placement for *Australoheros*.

358         Our analyses unambiguously find a monophyletic clade of purely Central  
359 American taxa that corresponds with the amphiloophines of Říčan et al. (2016), even  
360 though our analysis did not include their genera *Cryptoheros*, *Talamancaheros* and  
361 *Isthmoheros*. Despite this correspondence, however, our analyses produced different  
362 internal relationships among the included genera. For example, while Říčan et al. (2016)  
363 found *Parachromis* in a subclade with *Amatitlania*, we find it in a different subclade that  
364 includes *Amphilophus* (Fig. 1). Likewise, our grouping corresponds roughly with the  
365 amphiloophines of López-Fernández et al. 2010, but excludes *Trichromis* ('*Cichlasoma*'  
366 *salvini* in their Fig. 1). Even though the results of our phylogenomic analyses have



367 stronger statistical support than those of López-Fernández et al. (2010) and of Říčan et al.  
368 (2016, see their Fig. 5), the amphiphine clade found herein contains the largest number  
369 of weakly supported nodes in our analyses. It is interesting to note that, among  
370 amphiphines, the sequential position of *Petenia* and *Chortiheros* as sister to a clade of  
371 *Amatitlania*, *Hypsophrys* and *Neetroplus* was consistently recovered in all analyses, but  
372 support for this arrangement was ambiguous (Figs. 1, S1 [Appendix M], and S2  
373 [Appendix N]). Říčan et al. (2016) recovered *Petenia* and *Chortiheros* as sister to each  
374 other, but none of our analyses supported that relationship.

375         The largest disagreement among topologies obtained in this study, as well as with  
376 those from previously published analyses, involves the genera in the informal clade  
377 herichthyines, the Caribbean genus *Nandopsis*, and the caquetaines clade containing the  
378 genera *Caquetaia*, *Heroina* and the recently named genus *Kronoheros* (Fig. 2A). The  
379 relationship between these lineages and the amphiphines also varies among our three  
380 analyses, and often differs from relationships found in other studies. It is interesting that  
381 our concatenated and STAR coalescent analyses are more similar with each other than  
382 either is to the ASTRAL-II topology. In Říčan et al.'s (2016) analysis, the caquetaines  
383 were sister to a clade of amphiphines and herichthyines with *Nandopsis* sister to the  
384 latter. This is a similar arrangement to that found in our STAR and concatenated  
385 analyses, but in our ASTRAL-II topology (Fig. 2A) *Nandopsis* was sister to  
386 amphiphines, and in turn, the two were sister to the caquetaines. In all analyses, at least  
387 some of these relationships are inconclusively supported, although the concatenated  
388 analysis obtained the highest bootstrap values of the three. In Říčan et al.'s (2016)  
389 analysis, *Chiapaheros* remained in a polytomy. In our analysis, it is part of a well-

390 supported clade along with two other well-supported groupings: *Thorichthys* and  
391 *Trichromis* and a clade comprising *Herichthys*, *Vieja*, *Wajpamheros*, *Chuco* and *Theraps*,  
392 but the relationships among these three lineages remain unclear (Fig. 2A).

393 Relationships among Geophagini in all analyses were generally compatible with  
394 those previously described by López-Fernández et al. (2012) and comprised by two major  
395 clades compatible with those described by López-Fernández et al. (2010, 2012). In the  
396 first of these, a clade of *Guianacara* and *Mazarunia* is sister to a clade of  
397 “apistogrammines” and “crenicichlines” sensu López-Fernández et al. (2010). Except for  
398 a few nodes within the *Crenicichla-Teleocichla* group and another one within *Mazarunia*,  
399 relationships within this large clade are largely congruent with previous results and well  
400 supported. Additionally, the sister relationship between *Acarichthys* and *Biotocus* was  
401 unambiguously recovered, but support of its sister relationship to *Crenicichla* was always  
402 below 100%.

403 A second clade of Geophagini comprised the genus *Biotodoma*, the  
404 “geophagines”, “mikrogeophagines” and “crenicaratines” of López-Fernández et al.  
405 (2010). Monophyly of the “geophagines” (genera *Geophagus*, *Gymnogeophagus* and the  
406 ‘*Geophagus*’ *steindachneri* group) was unambiguously supported by all analyses, but  
407 relationships within the group were different in the three topologies (Fig. 2B). Moreover,  
408 the relative position of the genus *Biotodoma* and the “mikrogeophagines” (genera  
409 *Mikrogeophagus* and ‘*Geophagus*’ *brasiliensis*) was different in the coalescent-based  
410 analyses compared to the concatenated topology. As discussed below, ambiguity in the  
411 placement of the “geophagines” genera could have implications for estimating the age of  
412 cichlids.

413 Relationships within Cichlasomatini were generally identical among analyses. In  
414 all cases, a clade including *Nannacara*, *Ivanacara* and *Cleithracara* was recovered as the  
415 unambiguously supported sister group to the rest of Cichlasomatini. This clade is  
416 equivalent to the “nannacarines” sensu López-Fernández et al. (2010), but its position  
417 with respect to the rest of the tribe is novel with respect to previous studies. Musilová et  
418 al. (2009) found the “nannacarines” as sister to *Laetacara* but with low support, and  
419 López-Fernández et al. (2010) found it as sister to a clade of *Laetacara*, *Acaronia* and  
420 their “andinoacarines”, but also with low support. The genera *Cichlasoma* and *Aequidens*  
421 were found as sister to *Krobia* in all studies and as expected from previous work (López-  
422 Fernández et al. 2010; Musilová et al. 2009). Our analyses also unambiguously recovered  
423 a well-supported monophyly of *Andinoacara* and *Bujurquina* which in turn are sister to  
424 *Tahuantinsuyoa* (andinoacarines, sensu López-Fernández et al. 2010). *Acaronia* and  
425 *Laetacara* were recovered as sister to the “andinoacarines” but the relative placement of  
426 the genera with respect to each other was not unambiguously supported in any of the  
427 analyses. Placement of these two genera has varied across studies: Musilová et al. (2009)  
428 found *Acaronia* to be sister to all Cichlasomatini, with *Laetacara* either sister to the  
429 remainder of the tribe or to the *Cichlasoma*, *Aequidens* and *Krobia* clade  
430 (cichlasomatines); López-Fernández et al. (2010) recovered a weakly supported sister  
431 clade that in turn was sister to “andinoacarines”, but support was low.

432

#### 433 **4. Discussion**

434 Even though higher-level relationships among clades and genera of Neotropical  
435 cichlids have become increasingly resolved and supported by recent work, the position of

436 several groups remains uncertain or weakly supported. In this study, we used a recently  
437 developed set of exon-targeting probes and massive parallel next generation sequencing  
438 to generate a large dataset aimed at resolving Cichlinae relationships that remain poorly  
439 supported. Our phylogenomic analyses confirm many relationships previously found  
440 among Neotropical cichlids, and provide unprecedented resolution and support for many  
441 relationships that were previously weakly supported, especially near the base of the tree.  
442 This is particularly true among some genera of Central American lineages in the  
443 amphiphines clade, the unambiguous clarification of the relationship among  
444 Geophagini clades crenicichlines, apistogrammines and guianacarinés (sensu López-  
445 Fernández et al. 2010), and the strongly supported position of the Cichlasomatini clade  
446 nannacarinés as the sister group to the rest of the tribe (Fig. 1 and see Figs. S1 and S2,  
447 Appendices M and N, respectively). Nevertheless, despite an increase of two orders of  
448 magnitude in data when compared with other sequencing studies (e.g., López-Fernández  
449 et al. 2010; Říčan et al. 2013), some relationships remain unclearly established or poorly  
450 supported. The three main regions of the tree that continue to resist clear resolution  
451 include the Central American herichthyines, the position of the Cichlasomatini genera  
452 *Laetacara* and *Acaronia*, and the order of divergence among genera in the Geophagini  
453 clade including *Geophagus*, *Gymnogeophagus* and the '*Geophagus*' *steindachneri* clade  
454 (Fig. 2).

455 Previous studies have repeatedly found that Neotropical cichlids diversified over a  
456 relatively short time period, as evidenced by short branches and frequently weakly  
457 supported relationships near the base of the tree (e.g., Farias et al. 1999; López-  
458 Fernández et al. 2005, 2010). Most of the previously unresolved or weakly supported

459 relationships in the López-Fernández et al. (2010) study, which has the most comparable  
460 taxon sampling to this study, are resolved with unambiguous support by the  
461 phylogenomic analyses presented here regardless of the method used (compare Fig. 1 of  
462 both studies). Thus, in combination, the generalized stability of higher-level phylogenetic  
463 hypotheses obtained through both summary coalescent and concatenation methods in our  
464 analyses, suggests that conflict between gene trees and the species tree is relatively rare  
465 among Neotropical cichlids. It appears that incomplete lineage sorting and other sources  
466 of misleading phylogenetic signal, such as introgression or hybridization, do not  
467 frequently disrupt our ability to reconstruct relationships. We make this assertion with  
468 caution, however, because detailed phylogeographic studies of Neotropical cichlids have  
469 shown that at least some taxa may be affected by these problems, particularly at more  
470 recent levels of divergence (e.g., Willis 2017; Willis et al. 2013). Even more germane to  
471 our study, the persistence of unresolved or poorly supported “deep” relationships within a  
472 few clades of Cichlinae may indicate a role for deep coalescence or other confounding  
473 effects in some early events of divergence among Neotropical cichlids (Fig. 2).

474         This point is particularly relevant because the tribes containing the remaining  
475 unresolved or conflictive clades underwent relatively quick adaptive diversification  
476 giving origin to a variety of lineages (Arbour and López-Fernández 2014; López-  
477 Fernández et al. 2013). It is suggestive that the largest remaining conflicts within the tree  
478 involve the Central American herichthyines, including some Central American genera  
479 with South American distribution and the Caribbean genus *Nandopsis* (Fig. 2A). Recent  
480 work has shown that invasion of Central America by the tribe Heroini provided renewed  
481 ecological opportunity that allowed this clade to rapidly diversify into a broad variety of

482 ecologically specialized forms (Arbour and López-Fernández 2016). It is conceivable that  
483 such rapid adaptive divergence produced incomplete lineage sorting among some heroine  
484 lineages, resulting in reduced phylogenetic resolution (e.g., Edwards 2009; Kubatko and  
485 Degnan 2007). In fact, the early radiation of the Neotropical cichlid tribes in South  
486 America has been similarly shown to have occurred quickly, potentially leaving a  
487 similarly conflictive gene tree divergence patterns in other regions of the tree, particularly  
488 within Geophagini, which dominates the lineage and functional diversity of South  
489 American Neotropical cichlids (Arbour and López-Fernández 2014; Astudillo-Clavijo et  
490 al. 2015; López-Fernández et al. 2013). Even if early adaptive radiation in Neotropical  
491 cichlids resulted in incomplete lineage sorting in some clades, our results suggest that its  
492 effects may not be extensive because, with the exceptions pointed out above, both our  
493 concatenated and coalescent analyses recover largely congruent phylogenies. Moreover,  
494 most of the relationships recovered herein are congruent with those found in previous  
495 studies based on much smaller, concatenated datasets (e.g., López-Fernández et al. 2010;  
496 McMahan et al. 2013; Musilová et al. 2009; Říčan et al. 2008) and with the ddRAD-  
497 based analysis of Central American heroines of Říčan et al. (2016).

498         The ability to generate a reliable phylogeny has important consequences beyond  
499 the mere systematic implications of the study. Uncertainty about the order of divergence  
500 and relationships among genera and higher clades can affect our ability to reconstruct the  
501 history of evolutionary divergence in cichlids. Three types of studies could be affected by  
502 diminishing but still present uncertainty in Neotropical cichlid relationships. Robust  
503 topologies are critical for using the fossil record to calibrate molecular phylogenies and  
504 reconstruct the timeline of diversification of a clade. The fossil record of cichlids is

505 relatively scarce, and considerable debate has ensued regarding the identity and  
506 placement of fossils, particularly the recently described Eocene fossils from the Lumbrera  
507 formation in Argentina (e.g., Friedman et al. 2013; López-Fernández et al. 2013;  
508 Malabarba et al. 2010, 2014). On the one hand, the strong support received by most  
509 nodes in our analyses should provide a solid scaffold for time calibration. Unfortunately,  
510 one of the most unstable relationships, that involving the geophagine genera  
511 *Gymnogeophagus*, *Geophagus* and '*Geophagus*' *steindachneri*, affects the certainty with  
512 which the Eocene fossil †*Gymnogeophagus eocenicus* can be placed on the tree. As a  
513 consequence, calibration of *Gymnogeophagus* remains uncertain because it is unclear  
514 whether the genus is sister to the broadly distributed *Geophagus* sensu stricto or to the  
515 northern Andes clade including '*Geophagus*' *steindachneri* (Fig. 2B). Therefore, the  
516 inconclusively established position of a fossil-bearing clade can have important  
517 consequences in both reconstruction of the timeline of divergence and the historical  
518 biogeography of South American cichlids.

519         From a biogeographic point of view, the uncertainty observed among Central  
520 American cichlids is likely to have even more dramatic consequences. The incongruent  
521 placement of the Caribbean genus *Nandopsis* and of the South American caquetaines  
522 limits our ability to accurately recreate the history of heroine invasion of Central America  
523 and for understanding the events driving the potential recolonization of South America by  
524 some of the Mesoamerican heroine lineages such as *Mesoheros* and the caquetaines.  
525 Recent studies that have addressed the historical biogeography of Central American  
526 cichlids and their relationships to South America have relied on single reconstructions of  
527 the phylogeny based on either a small number of concatenated loci (e.g., Říčan et al.

528 2013; Tagliacollo et al. 2015) or on phylogenomic approaches based on concatenation of  
529 single nucleotide polymorphisms (Říčan et al. 2016). These studies focus on  
530 interpretations of the particular trees found in each of their analyses, but our study  
531 suggest that the historical biogeography of Central America may require either a more  
532 exhaustive analysis of phylogenetic relationships or the reconstruction of competing,  
533 alternative scenarios that reflect the current uncertainty in the phylogeny. Based purely  
534 on methodological arguments of performance and accuracy (e.g., Arcila et al. 2017;  
535 Mirarab and Warnow 2015), it is possible that our ASTRAL-II topology provides a more  
536 stable framework for analysis, but the weak support received by nodes in that  
537 arrangement suggest that any interpretations of historical biogeography should be done  
538 cautiously.

539         Phylogenies are also becoming increasingly important as the framework to  
540 perform macroevolutionary analyses of lineage and phenotypic divergence. With a  
541 proliferation of comparative methods and the increased availability of well supported and  
542 increasingly better dated trees, our ability to infer patterns and processes of divergence  
543 continues to improve. With several studies recently addressing the evolution of  
544 Neotropical cichlids (e.g., , Arbour and López-Fernández 2013, 2014, 2016; Astudillo-  
545 Clavijo et al. 2015; Burrell 2016; Hulsey et al. 2006; López-Fernández et al. 2013), it is  
546 pertinent to ask whether changes in the topology may require modification of our  
547 emerging understanding of Cichlinae macroevolution. The phylogeny obtained herein is  
548 remarkably similar to the López-Fernández et al. (2010) tree used in most of the  
549 macroevolutionary analyses listed above, suggesting that macroevolutionary conclusions  
550 to date are robust. When analyses are performed on a sample of the posterior distribution



551 of the dated phylogeny and not just on the maximum clade credibility (MCC) tree,  
552 topological uncertainty should be reflected in the results such that observed  
553 macroevolutionary patterns should be robust to moderate topological changes. This  
554 should be particularly true for analyses of phenotypic divergence based on the  
555 construction of morphospaces, such as disparity through time and adaptive landscape  
556 inferences (e.g., Ingram and Mahler 2013; Slater and Pennel 2014). Likely more sensitive  
557 to changes in the tree are lineage through time and rate analyses because they depend on  
558 branch lengths in ultrametric trees, which in turn depend on the accuracy of both the  
559 topology and of age estimates. Because coalescent summary analyses such as ASTRAL-  
560 II and STAR do not provide branch lengths, the species trees estimated here cannot be  
561 used directly in comparative analyses that require ultrametric topologies derived from  
562 estimates of absolute time.

563         Finally, generating an ultrametric topology by dating phylogenomic datasets  
564 remains a challenge. In principle, there is no reason that phylogenomic species-tree  
565 hypotheses cannot be dated, but in practice it is not clear if the incorporation of large  
566 phylogenomic datasets and fossil data into actual analyses is computationally feasible  
567 (e.g., Bouckaert et al. 2014; Matschiner et al. 2017). Moreover, among other problems,  
568 traditional node dating methods require a priori placement of fossils on topologies,  
569 further complicating the use of fossils in unresolved clades, such as †*Gymnogeophagus*  
570 *eocenicus* within the geophagines. Alternatively, emerging total evidence dating methods  
571 that simultaneously generate phylogenies and age estimates combining molecular,  
572 morphological and fossil data may provide more flexibility and accuracy *vis a vis*  
573 uncertainty in the molecular phylogenies (e.g., Heath et al. 2014). Whether these methods

574 can be employed in truly phylogenomic contexts with hundreds of loci and taxa is not yet  
575 clear (e.g., Gavryushkina et al. 2016; Ronquist et al. 2012).

576

## 577 **5. Conclusion**

578 Phylogenomic analyses of Neotropical cichlids (subfamily Cichlinae) using 415  
579 exons for 139 species in both concatenated and summary statistic coalescent frameworks  
580 resulted in generally well-resolved, strongly-supported and broadly-congruent topologies.  
581 The topologies obtained are similar to previous hypotheses of relationships among  
582 Cichlinae but, in general, provide stronger support for many relationships that previously  
583 had weak or conflicting support. The results of our analyses also suggest that the targeted  
584 genomic regions contain phylogenetic signal capable of resolving relationships at all  
585 levels of divergence within the clade. Nevertheless, we identified several regions of the  
586 tree in which relatively early divergence events cannot be reconstructed with certainty  
587 because different methods provide conflicting results, none of them with conclusive  
588 support. We suggest this incongruence may result from incompletely lineage sorting  
589 associated with the early adaptive divergence of the clades in which incongruence is  
590 observed. We argue that, despite some disagreements in the placement of these lineages  
591 both in this study and in previous analyses, most studies provide a broadly common  
592 signal of evolutionary relationships among Neotropical cichlids. A generally better  
593 supported phylogeny derived from our phylogenomic analyses should continue to provide  
594 a solid framework for the evolutionary analysis of lineage and phenotypic divergence in  
595 Neotropical cichlids. Future work will focus in further clarifying relationships within the  
596 few recalcitrant clades identified herein, and in leveraging the current dataset as a

597 uniquely strong molecular framework for clarifying the timeline of evolutionary  
598 divergence among Neotropical cichlids.

599

## 600 **Acknowledgements**

601 The authors are grateful to the following for curatorial assistance and the loan of tissue  
602 samples not available at the ROM collection: M. Burrige, M. Zur, and E. Holm (Royal  
603 Ontario Museum [ROM]), M. Stiassny and B. Brown (American Museum of Natural  
604 History, New York), M. Sabaj (Academy of Natural Sciences of Drexel University,  
605 Philadelphia), R. Rodiles-Hernández (ECOSUR), L.R. Malabarba (Universidade Federal  
606 do Rio Grande do Sul, Porro Alegre, Brazil), J. Armbruster (Auburn University Museum,  
607 Auburn, Alabama) and Yves Fermon (Muséum National d'Histoire Naturelle, Paris). We  
608 further thank the people who assisted during fieldwork related to this work: J. Arbour, D.  
609 Bloom, R. Rodiles-Hernández, F. Hauser, N. Lujan, N. Meliciano, E. Liverpool, C.  
610 Montaña, G. Ortí, S. Refvik, M. Röepke, M. Soria, D. Taphorn, M. Tobler, S. Willis, and  
611 K. Winemiller. Some computations were performed on the GPC supercomputer at the  
612 SciNet HPC Consortium. SciNet is funded by the Canada Foundation for Innovation  
613 under the auspices of Compute Canada, the Government of Ontario, Ontario Research  
614 Fund - Research Excellence, and the University of Toronto. We further thank R.  
615 Williamson for assistance with the development in the custom scripts used in the  
616 bioinformatics pipeline. Funding for this work, including fieldwork and laboratory  
617 analyses was provided by a Discovery Grant from the Natural Sciences and Engineering  
618 Research Council of Canada, ROM Governors and the National Geographic Society  
619 grants to HLF. Additional fieldwork was supported by a Coypu Foundation Grant to N.

620 Lujan and ROM Trust Funds to HLF. KLI was supported by a Rebanks Postdoctoral  
621 Fellowship from the ROM Governors granted to HLF to develop a phylogenomic toolkit  
622 for the phylogenetic analysis of cichlids.

623

## 624 **References**

625 Arbour J, López-Fernández H. 2013. Ecological variation in South American geophagine  
626 cichlids arose during an early burst of adaptive morphological and functional  
627 evolution. *Proc. Roy. Soc. B Biol. Sci.* 280: 20130849.

628 <https://doi.org/10.1098/rspb.2013.0849>

629 Arbour JH, López-Fernández H. 2014. Adaptive landscape and functional diversity of  
630 Neotropical cichlids: implications for the ecology and evolution of Cichlinae  
631 (Cichlidae; Cichliformes). *J. Evol. Biol.* 27:2431–42.

632 <https://doi.org/10.1111/jeb.12486>

633 Arbour JH, López-Fernández H. 2016. Continental cichlid radiations: functional diversity  
634 reveals the role of changing ecological opportunity in the Neotropics. *Proc. R.  
635 Soc. B Biol. Sci.* 283:20160556. <https://doi.org/10.1098/rspb.2016.0556>

636 Arcila D, Ortí G, Vari R, Armbruster JW, Stiassny MLJ, Ko KD, Sabaj MH, Lundberg J,  
637 Revell LJ, Betancur-R R. 2017. Genome-wide interrogation advances resolution  
638 of recalcitrant groups in the Tree of Life. *Nat. Ecol. Evol.*

639 <https://doi.org/10.1038/s41559-016-0020>

640 Astudillo-Clavijo V, Arbour JH, López-Fernández H. 2015. Selection towards different  
641 adaptive optima drove the early diversification of locomotor phenotypes in the

642 radiation of Neotropical geophagine cichlids. *BMC Evol. Biol.* 15:77.  
643 <https://doi.org/10.1186/s12862-015-0348-7>

644 Bouckaert R, Heled J, Kühnert D, Vaughan T, Wu CH, Xie D, Suchard MA, Rambaut A,  
645 Drummond AJ. 2014. BEAST 2: A Software Platform for Bayesian Evolutionary  
646 Analysis. *PLoS Comput. Biol.* 10:1–6.  
647 <https://doi.org/10.1371/journal.pcbi.1003537>

648 Bowmaker JK. 2008. Evolution of vertebrate visual pigments. *Vis. Res.* 48:2022–41.  
649 <https://doi.org/10.1016/j.visres.2008.03.025>

650 Brawand D, Wagner CE, Li YI, Malinsky M, Keller I, Fan S, Simakov O, Ng AY, Lim  
651 ZW, Bezault E, Turner-Maier J, Johnson J, Alcazar R, Noh HJ, Russell P, Aken  
652 B, Alföldi J, Amemiya C, Azzouzi N, Baroiller J-F, Barloy-Hubler F, Berlin A,  
653 Bloomquist R, Carleton KL, Conte M a., D’Cotta H, Eshel O, Gaffney L, Galibert  
654 F, Gante HF, Gnerre S, Greuter L, Guyon R, Haddad NS, Haerty W, Harris RM,  
655 Hofmann H a., Hourlier T, Hulata G, Jaffe DB, Lara M, Lee AP, MacCallum I,  
656 Mwaiko S, Nikaido M, Nishihara H, Ozouf-Costaz C, Penman DJ, Przybylski D,  
657 Rakotomanga M, Renn SCP, Ribeiro FJ, Ron M, Salzburger W, Sanchez-Pulido  
658 L, Santos ME, Searle S, Sharpe T, Swofford R, Tan FJ, Williams L, Young S, Yin  
659 S, Okada N, Kocher TD, Miska E a., Lander ES, Venkatesh B, Fernald RD,  
660 Meyer A, Ponting CP, Streelman JT, Lindblad-Toh K, Seehausen O, Di Palma F.  
661 2014. The genomic substrate for adaptive radiation in African cichlid fish. *Nature*  
662 513:375–381. <https://doi.org/10.1038/nature13726>

- 663 Burress ED. 2016. Ecological diversification associated with the pharyngeal jaw diversity  
664 of Neotropical cichlid fishes. *J. Anim. Ecol.* 85:302–313.  
665 <https://doi.org/10.1111/1365-2656.12457>
- 666 Concheiro-Pérez G, Rícan O, Ortí G, Bermingham E, Doadrio I, Zardoya R. 2007.  
667 Phylogeny and biogeography of 91 species of heroine cichlids (Teleostei:  
668 Cichlidae) based on sequences of the cytochrome b gene. *Mol. Phylogenet. Evol.*  
669 43:91–110. <https://doi.org/10.1016/j.ympev.2006.08.012>
- 670 Dornburg A, Townsend JP, Friedman M, Near TJ. 2014. Phylogenetic informativeness  
671 reconciles ray-finned fish molecular divergence times. *BMC Evol. Biol.* 14:169.  
672 <https://doi.org/10.1186/s12862-014-0169-0>
- 673 Edgar RC. 2004. MUSCLE: multiple sequence alignment with high accuracy and high  
674 throughput. *Nucleic Acids Res.* 32:1792–1797.  
675 <https://doi.org/10.1093/nar/gkh340>
- 676 Edwards SV. 2009. Is a new and general theory of molecular systematics emerging?  
677 *Evolution* 63:1–19. <https://doi.org/10.1111/j.1558-5646.2008.00549.x>
- 678 Farias IP, Ortí G, Meyer A. 2000. Total evidence: molecules, morphology, and the  
679 phylogenetics of cichlid fishes. *J. Exp. Zool.* 288:76–92.
- 680 Farias IP, Ortí G, Sampaio I, Schneider H, Meyer A. 1999. Mitochondrial DNA  
681 phylogeny of the family Cichlidae: monophyly and fast molecular evolution of  
682 the Neotropical assemblage. *J. Mol. Evol.* 48:703–711.
- 683 Farias IP, Ortí G, Sampaio I, Schneider H, Meyer A. 2001. The cytochrome b gene as a  
684 phylogenetic marker: the limits of resolution for analyzing relationships among  
685 cichlid fishes. *J. Mol. Evol.* 53:89–103. <https://doi.org/10.1007/s002390010197>

- 686 Friedman M, Keck BP, Dornburg A, Eytan RI, Martin CH, Darrin C, Wainwright PC,  
687 Near TJ, Hulsey CD. 2013. Molecular and fossil evidence place the origin of  
688 cichlid fishes long after Gondwanan rifting. *Proc. R. Soc. B Biol. Sci.*  
689 280:20131733. <https://doi.org/10.1098/rspb.2013.1733>
- 690 Fryer G, Iles TD. 1972. *The cichlid fishes of the Great Lakes of Africa*. TFH Publications
- 691 Gavryushkina A, Heath TA, Ksepka DT, Stadler T, Welch D, Drummond AJ. 2017.  
692 Bayesian total-evidence dating reveals the recent crown radiation of penguins.  
693 *Syst. Biol.* 66:57–73. <https://doi.org/10.1093/sysbio/syw060>
- 694 Heath TA, Huelsenbeck JP, Stadler T. 2014. The fossilized birth-death process for  
695 coherent calibration of divergence-time estimates. *Proc. Natl. Acad. Sci. U.S.A.*  
696 <https://doi.org/10.1073/pnas.1319091111>
- 697 Heled J, Drummond AJ. 2010. Bayesian inference of species trees from multilocus data.  
698 *Mol. Biol. Evol.* 27:570–80. <https://doi.org/10.1093/molbev/msp274>
- 699 Hulsey CD, García De León FJ. 2005. Cichlid jaw mechanics: Linking morphology to  
700 feeding specialization. *Funct. Ecol.* 19:487–494.  
701 <https://doi.org/10.1111/j.1365-2435.2005.00987.x>
- 702 Hulsey CD, García de León FJ, Rodiles-Hernández R. 2006. Micro- and  
703 macroevolutionary decoupling of cichlid jaws: a test of Liem’s key innovation  
704 hypothesis. *Evolution* 60:2096–109.
- 705 Hulsey DC, García de León FJ, Sánchez Johnson Y, Hendrickson DA, Near TJ. 2004.  
706 Temporal diversification of Mesoamerican cichlid fishes across a major  
707 biogeographic boundary. *Mol. Phylogenet. Evol.* 31:754–764.  
708 <https://doi.org/10.1016/j.ympev.2003.08.024>

- 709 Hulsey CD, Hollingsworth PR, Fordyce JA. 2010. Temporal diversification of Central  
710 American cichlids. *BMC Evol. Biol.* 10:279.  
711 <https://doi.org/10.1186/1471-2148-10-279>
- 712 Ilves KL, López-Fernández H. 2014. A targeted next-generation sequencing toolkit for  
713 exon-based cichlid phylogenomics. *Mol. Ecol. Res.* 14:802–811.
- 714 Ingram T, Mahler DL. 2013. SURFACE: Detecting convergent evolution from  
715 comparative data by fitting Ornstein-Uhlenbeck models with stepwise Akaike  
716 Information Criterion. *Methods Ecol. Evol.* 4:416–425.  
717 <https://doi.org/10.1111/2041-210X.12034>
- 718 Kearse M, Moir R, Wilson A, Stones-Havas S, Cheung M, Sturrock S, Buxton  
719 S, Cooper A, Markowitz S, Duran C, Thierer T, Ashton B, Mentjies P,  
720 Drummond A. 2012. Geneious Basic: an integrated and extendable desktop  
721 software platform for the organization and analysis of sequence data.  
722 *Bioinformatics* 28:1647–1649.
- 723 Kocher TD. 2004. Adaptive evolution and explosive speciation: the cichlid fish model.  
724 *Nat. Rev. Genet.* 5:288–298. <https://doi.org/10.1038/nrg1316>
- 725 Kubatko LS, Degnan JH. 2007. Inconsistency of phylogenetic estimates from  
726 concatenated data under coalescence. *Syst. Biol.* 56:17–24.  
727 <https://doi.org/10.1080/10635150601146041>
- 728 Kullander SO. 1998. A Phylogeny and Classification of the Neotropical Cichlidae  
729 (Teleostei: Perciformes). In: Malabarba LR, Reis RE, Vari RP, Lucena ZM,  
730 Lucena CAS. (Eds.). *Phylogeny and classification of Neotropical fishes.*  
731 EDIPUCRS, Porto Alegre, pp. 461–498.



- 732 Langmead B, Salzberg S. 2012. Fast gapped-read alignment with Bowtie 2. *Nat.*  
733 *Methods* 9:357–359. <https://doi.org/10.1038/nmeth.1923>
- 734 Li H, Handsaker B, Wysoker A, Fennell T, Ruan J, Homer N, Marth G, Abecasis G,  
735 Durbin R. 2009. The sequence alignment/ map (SAM) format and SAMtools.  
736 *Bioinformatics* 25:2078–2079. <https://doi.org/10.1093/bioinformatics/btp352>
- 737 Liu L, Yu L, Pearl DK, Edwards SV. 2009. Estimating species phylogenies using  
738 coalescence times among sequences. *Syst. Biol.* 58:468–477.  
739 <https://doi.org/10.1093/sysbio/syp031>
- 740 Loken C, Gruner D, Groer L, Peltier R, Bunn N, Craig M, Henriques T,  
741 Dempsey J, Yu C-H, Chen J, Dursi LJ, Chong J, Northrup S, Pinto J, Knecht N,  
742 Van Zon R. 2010. SciNet: lessons learned from building a power-efficient top-20  
743 system and data centre. *J. Phys.: Conf. Ser.* 256, 012026.  
744 <https://doi.org/10.1088/1742-6596/256/1/012026>.
- 745 López-Fernández H, Arbour JH, Winemiller KO, Honeycutt RL. 2013. Testing for  
746 ancient adaptive radiations in neotropical cichlid fishes. *Evolution* 67:1321–37.  
747 <https://doi.org/10.1111/evo.12038>
- 748 López-Fernández H, Honeycutt RL, Winemiller KO. 2005. Molecular phylogeny and  
749 evidence for an adaptive radiation of geophagine cichlids from South America  
750 (Perciformes: Labroidei). *Mol. Phylogenet. Evol.* 34:227–44.  
751 <https://doi.org/10.1016/j.ympev.2004.09.004>
- 752 López-Fernández H, Taphorn DC, Liverpool EA. 2012. Phylogenetic diagnosis and  
753 expanded description of the genus *Mazarunia* Kullander, 1990 (Teleostei):

- 754 Cichlidae ) from the upper Mazaruni River, Guyana, with description of two new  
755 species. *Neotropical Ichthyol.* 10:465–486.  
756 <https://doi.org/10.1590/S1679-62252012000300001>
- 757 López-Fernández H, Winemiller KO, Honeycutt RL. 2010. Multilocus phylogeny and  
758 rapid radiations in Neotropical cichlid fishes (Perciformes: Cichlidae: Cichlinae).  
759 *Mol. Phylogenet. Evol.* 55:1070–1086.  
760 <https://doi.org/10.1016/j.ympev.2010.02.020>
- 761 Maddison W. 1997. Gene trees in species trees. *Syst. Biol.* 46:523–536.  
762 <https://doi.org/10.1093/sysbio/46.3.523>
- 763 Malabarba MC, Malabarba LR, Del Papa C. 2010. *Gymnogeophagus eocenicus*, n.  
764 sp.(Perciformes: Cichlidae), an Eocene cichlid from the Lumbrera Formation in  
765 Argentina. *J. Vert. Paleontol.* 30:341–350.  
766 <https://doi.org/10.1080/02724631003618348>
- 767 Malabarba MC, Malabarba LR, López-Fernández H. 2014. On the Eocene cichlids from  
768 the Lumbrera Formation: additions and implications for the Neotropical  
769 ichthyofauna. *J. Vert. Paleontol.* 34:49–58.  
770 <https://doi.org/10.1080/02724634.2013.830021>
- 771 Mendes FK, Hahn MW. 2017. Why concatenation fails in the anomaly zone. *bioRxiv.*  
772 <https://doi.org/10.1101/116509>
- 773 Matschiner M, Musilová Z, Barth JMI, Starostová Z, Salzburger W, Steel M, Bouckaert  
774 R. 2017. Bayesian phylogenetic estimation of clade ages supports trans-Atlantic  
775 dispersal of cichlid fishes. *Syst. Biol.* 66:3–22.  
776 <https://doi.org/10.1093/sysbio/syw076>

- 777 McMahan CD, Chakrabarty P, Sparks JS, Smith WL, Davis MP. 2013. Temporal patterns  
778 of diversification across global cichlid biodiversity (Acanthomorpha: Cichlidae).  
779 PLoS One 8:e71162. <https://doi.org/10.1371/journal.pone.0071162>
- 780 McMahan CD, Matamoros WA, Piller KR, Chakrabarty P. 2015. Taxonomy and  
781 systematics of the herichthyins (Cichlidae: Tribe Heroini), with the description of  
782 eight new Middle American Genera. *Zootaxa* 3999:211–234.  
783 <https://doi.org/10.11646/zootaxa.3999.2.3>
- 784 Mirarab S, Warnow T. 2015. ASTRAL-II: coalescent-based species tree estimation  
785 with many hundreds of taxa and thousands of genes. *Bioinformatics* 31:i44–i52.  
786 <https://doi.org/10.1093/bioinformatics/btv234>
- 787 Musilová Z, Říčan O, Janko K, Novák J. 2008. Molecular phylogeny and biogeography  
788 of the Neotropical cichlid fish tribe Cichlasomatini (Teleostei: Cichlidae:  
789 Cichlasomatinae). *Mol. Phylogenet. Evol.* 46:659–72.  
790 <https://doi.org/10.1016/j.ympev.2007.10.011>
- 791 Musilová Z, Říčan O, Novák J. 2009. Phylogeny of the Neotropical cichlid fish tribe  
792 Cichlasomatini (Teleostei: Cichlidae) based on morphological and molecular data,  
793 with the description of a new genus. *J. Zool. Syst. Evol. Res.* 47:234–247.  
794 <https://doi.org/10.1111/j.1439-0469.2009.00528.x>
- 795 Říčan O, Piálek L, Dragová K, Novák J. 2016. Diversity and evolution of the Middle  
796 American cichlid fishes (Teleostei: Cichlidae) with revised classification. *Vertebr.*  
797 *Zool.* 66:1–102.
- 798 Říčan O, Piálek L, Zardoya R, Doadrio I, Zrzavý J. 2013. Biogeography of the  
799 Mesoamerican Cichlidae (Teleostei: Heroini): colonization through the

- 800 GAARlandia land bridge and early diversification. *J. Biogeogr.* 40:579–593.  
801 <https://doi.org/10.1111/jbi.12023>
- 802 Říčan O, Zardoya R, Doadrio I. 2008. Phylogenetic relationships of Middle American  
803 cichlids (Cichlidae, Heroini) based on combined evidence from nuclear genes,  
804 mtDNA, and morphology. *Mol. Phylogenet. Evol.* 49:941–57.  
805 <https://doi.org/10.1016/j.ympev.2008.07.022>
- 806 Ronquist F, Klopfstein S, Vilhelmsen L, Schulmeister S, Murray DL, Rasnitsyn AP.  
807 2012. A total-evidence approach to dating with fossils, applied to the early  
808 radiation of the hymenoptera. *Syst. Biol.* 61:973–999.  
809 <https://doi.org/10.1093/sysbio/sys058>
- 810 Schmieder R, Edwards R. 2011. Quality control and preprocessing of metagenomic  
811 datasets. *Bioinformatics* 27:863–864.  
812 <https://doi.org/10.1093/bioinformatics/btr026>
- 813 Seehausen O. 2015. Process and pattern in cichlid radiations - inferences for  
814 understanding unusually high rates of evolutionary diversification. *New Phytol.*  
815 207:304–312. <https://doi.org/10.1111/nph.13450>
- 816 Seo TK. 2008. Calculating bootstrap probabilities of phylogeny using multilocus  
817 sequence data. *Mol. Biol. Evol.* 25, 960–971.
- 818 Shaw TI, Ruan Z, Glenn TC, Liu L. 2013. STRAW: Species TRee Analysis Web  
819 server. *Nucleic Acids Res.* 41, W238–W241. <https://doi.org/10.1093/nar/gkt377>
- 820 Slater GJ, Pennell MW. 2014. Robust regression and posterior predictive simulation  
821 increase power to detect early bursts of trait evolution. *Syst. Biol.* 63:293–308.  
822 <https://doi.org/10.1093/sysbio/syt066>

- 823 Smith L, Chakrabarty P, Sparks JS. 2008. Phylogeny, taxonomy, and evolution of  
824 Neotropical cichlids (Teleostei: Cichlidae: Cichlinae). *Cladistics* 24:625–641.
- 825 Sparks JS. 2004. Molecular phylogeny and biogeography of the Malagasy and South  
826 Asian cichlids (Teleostei: Perciformes: Cichlidae). *Mol. Phylogenet. Evol.*  
827 30:599–614. [https://doi.org/10.1016/S1055-7903\(03\)00225-2](https://doi.org/10.1016/S1055-7903(03)00225-2)
- 828 Sparks JS. 2008. Phylogeny of the Cichlid Subfamily Etroplinae and Taxonomic  
829 Revision of the Malagasy Cichlid Genus *Paretroplus* (Teleostei: Cichlidae). *Bull.*  
830 *Am. Mus. Nat. Hist.* 314:1–151. <https://doi.org/10.1206/314.1>
- 831 Sparks J, Smith W. 2004. Phylogeny and biogeography of cichlid fishes (Teleostei:  
832 Perciformes: Cichlidae). *Cladistics* 20:501–517.  
833 <https://doi.org/10.1111/j.1096-0031.2004.00038.x>
- 834 Stamatakis A. 2014. RAxML version 8: a tool for phylogenetic analysis and post-  
835 analysis of large phylogenies. *Bioinform.* 30:1312–1313.  
836 <https://doi.org/10.1093/bioinformatics/btu033>
- 837 Stiassny MLJ. 1991. Phylogenetic intrarelationships of the family Cichlidae: an  
838 overview. In: Keenleyside, M.H. (Ed.), *Cichlid Fishes: Behaviour, Ecology and*  
839 *Evolution*. Chapman Hall, London, pp. 1–35.
- 840 Tagliacollo VA, Duke-Sylvester SM, Matamoros WA, Chakrabarty P, Albert JS. 2015.  
841 Coordinated dispersal and pre-isthmian assembly of the Central American  
842 ichthyofauna. *Syst. Biol.* 66:183–196. <https://doi.org/10.1093/sysbio/syv064>
- 843 Wagner CE, Harmon LJ, Seehausen O. 2012. Ecological opportunity and sexual selection  
844 together predict adaptive radiation. *Nature* 487:366–369.  
845 <https://doi.org/10.1038/nature11144>

- 846 Weadick CJ, Loew ER, Rodd FH, Chang BSW. 2012. Visual pigment molecular  
847 evolution in the Trinidadian pike cichlid (*Crenicichla frenata*): a less colorful  
848 world for neotropical cichlids? *Mol. Biol. Evol.* 29:3045–60.  
849 <https://doi.org/10.1093/molbev/mss115>
- 850 Willis SC, Farias IP, Ortí G. 2013. Testing mitochondrial capture and deep coalescence  
851 in Amazonian cichlid fishes (Cichlidae: Cichla). *Evolution* 68:256–68.  
852 <https://doi.org/10.1111/evo.12230>
- 853 Willis SC. 2017. One species or four? Yes!...and, no. Or, arbitrary assignment of lineages  
854 to species obscures the diversification processes of Neotropical fishes. *PLoS One*  
855 12:e0172349. <https://doi.org/10.1371/journal.pone.0172349>

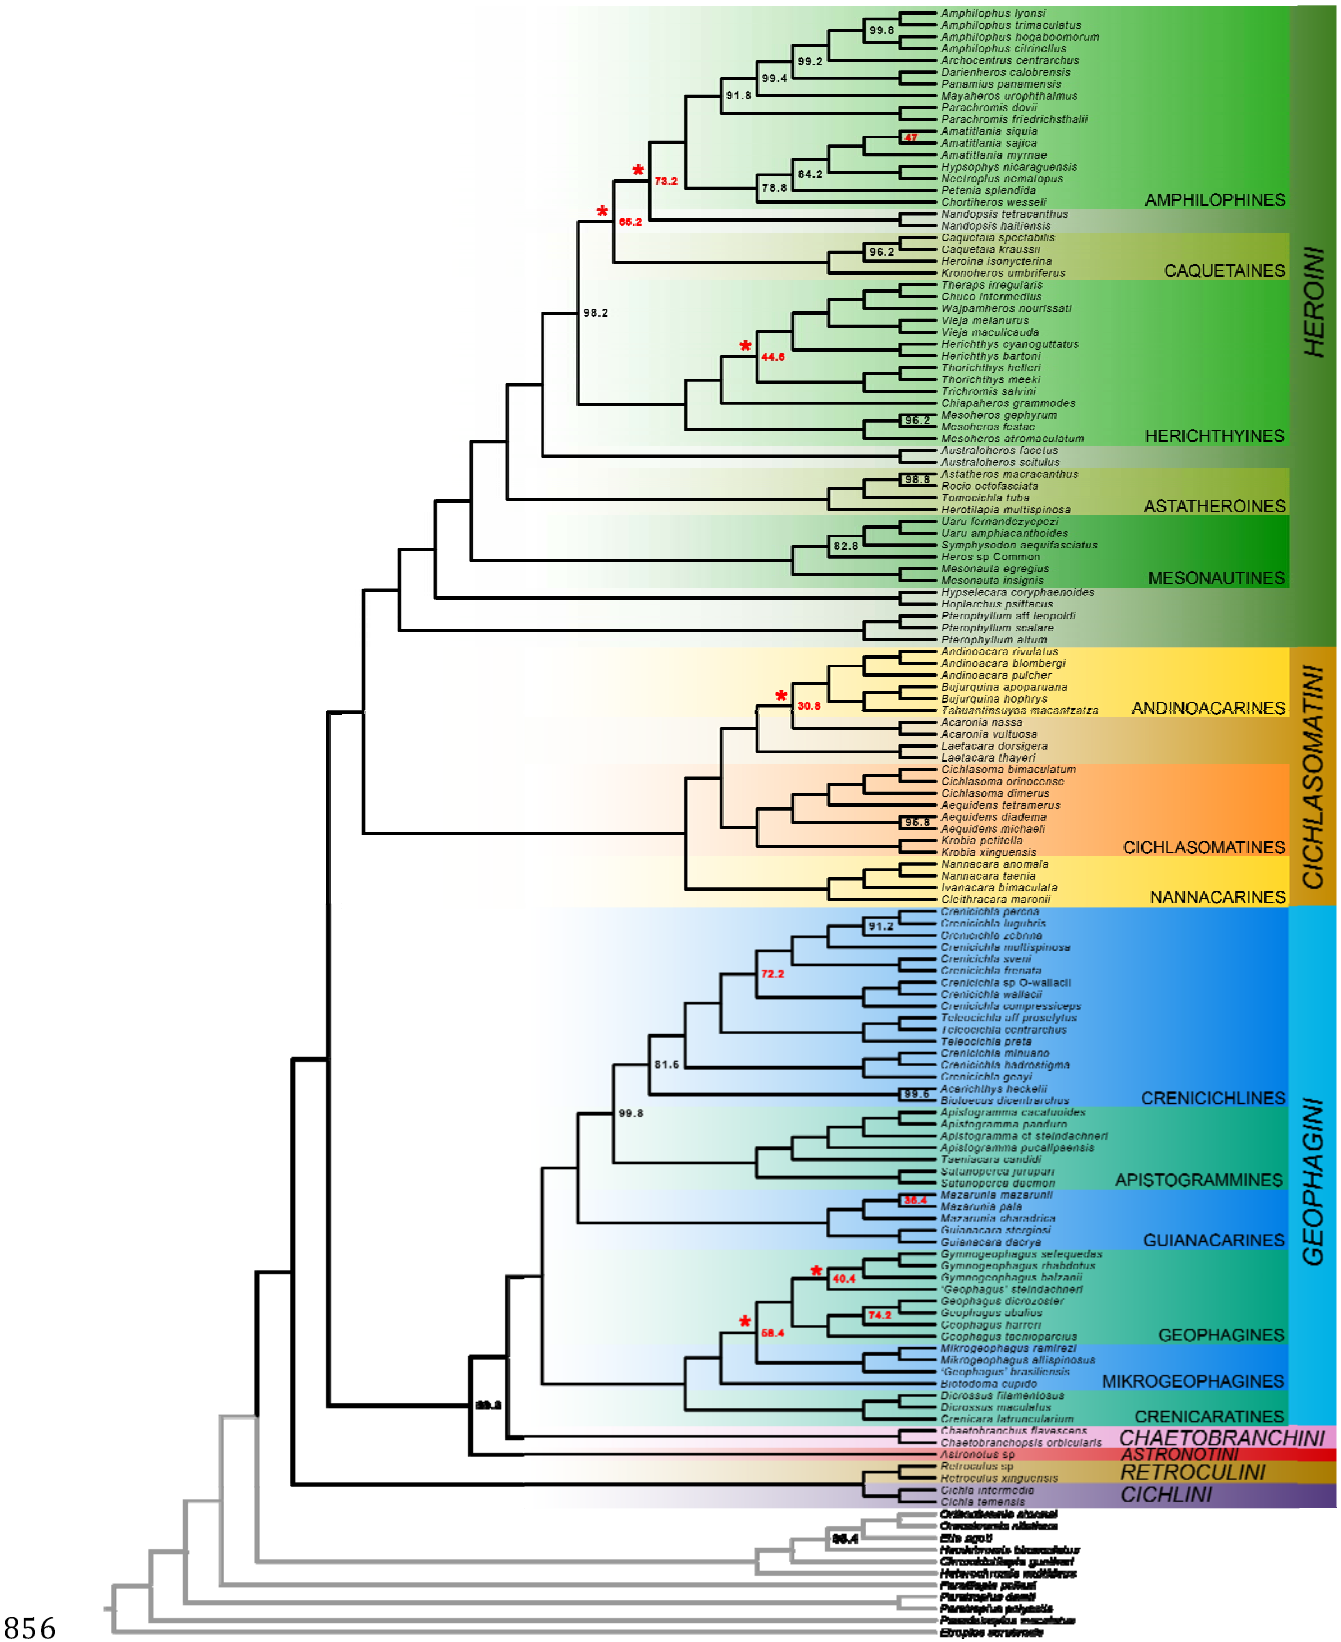

857 Figure 1. Species tree generated with ASTRAL-II for 415 loci comprising 471,448 bp.  
858 Colored clades depict formally recognized Neotropical cichlid tribes Heroini (Green),  
859 Cichlasomatini (Orange), Geophagini (Blue), Chaetobranchini (Magenta), Astronotini  
860 (Red), Retroculini (Brown), and Cichlini (Purple). See text for further discussion of  
861 relationships among and within tribes. Node bootstrap support is indicated when  
862 pertinent; nodes without labels received 100% support in this analysis. Nodes labeled in  
863 red received <75% bootstrap support. Nodes marked with an asterisk (\*) represent  
864 weakly supported intergeneric relationships with incongruent resolution among two  
865 different species-tree and one concatenated phylogenetic analyses. See Figure 2 and  
866 Discussion for further analyses of these results. Complete topologies not shown here are  
867 provided in Figs. S1 and S2, Appendices M and N, along with node support.



### A. Central American Heroini

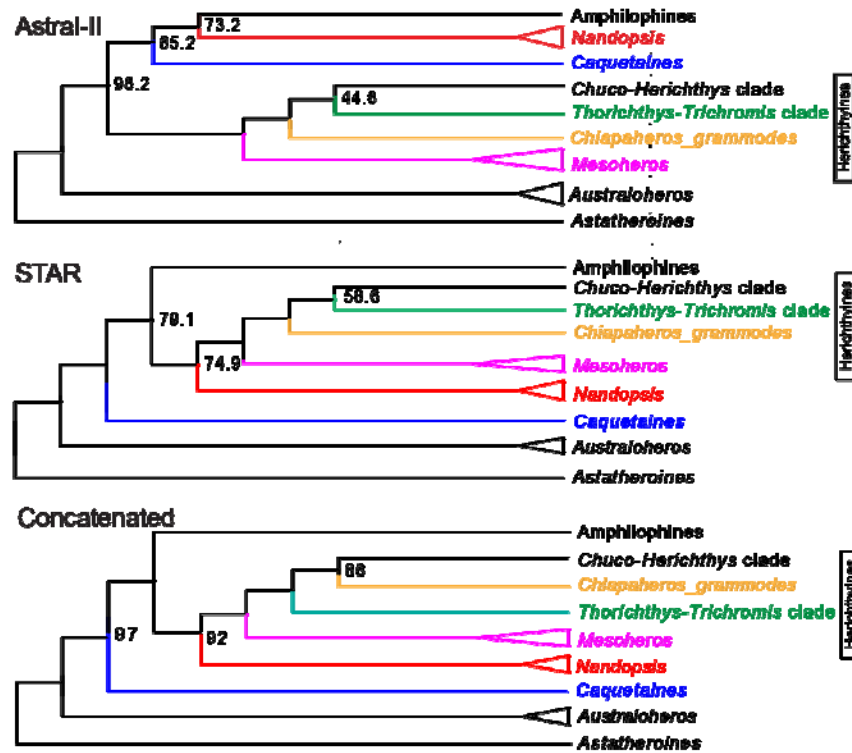

### B. Geophagini: *Geophagus*-*Gymnogeophagus* clade

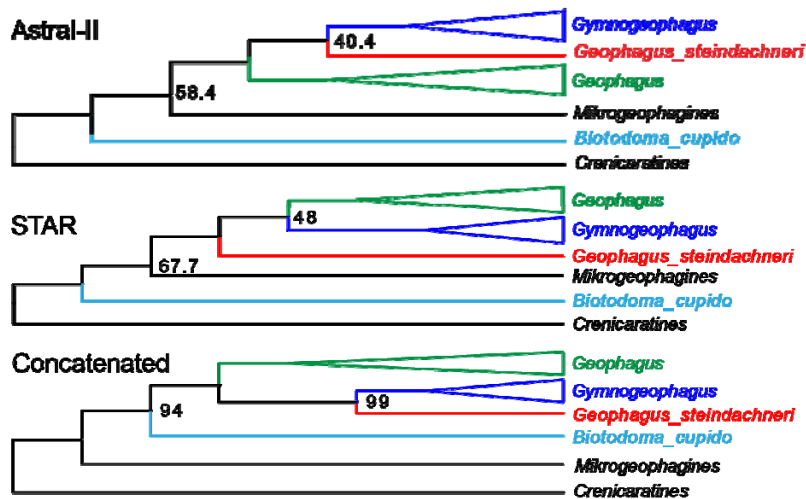

### C. Cichlasomatini: *Laetacara*-*Acaronia*

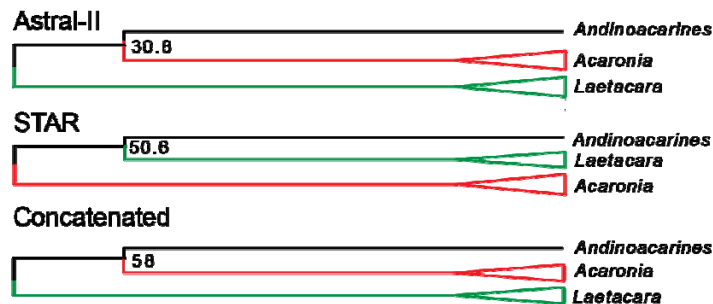

869 Figure 2. Conflicting results among analyses. Each panel depicts the alternative  
870 topological arrangements found in the clades highlighted with asterisks in Fig. 1. Colors  
871 are meant to represent lineages within each panel and not to be used as comparison  
872 among clades in different panels. Numbers by nodes represent bootstrap support in each  
873 case; nodes without numbers received 100% bootstrap support in their respective  
874 analyses. See Fig. 1 for the ASTRAL-II species tree and Appendices M and N (Figs. S1  
875 and S2) to see the concatenated and STAR topologies, respectively.
